# Supplementary material for: PRPF19 facilitates colorectal cancer liver metastasis through activation of the Src-YAP1 pathway via K63-linked ubiquitination of MYL9
Source: PubMed Central journal article supplement (PMC10082770; doi:10.1038/s41419-023-05776-2), 2023-04-08

**Figure 1C**

PRPF19

100 KD  
70 KD  
55 KD

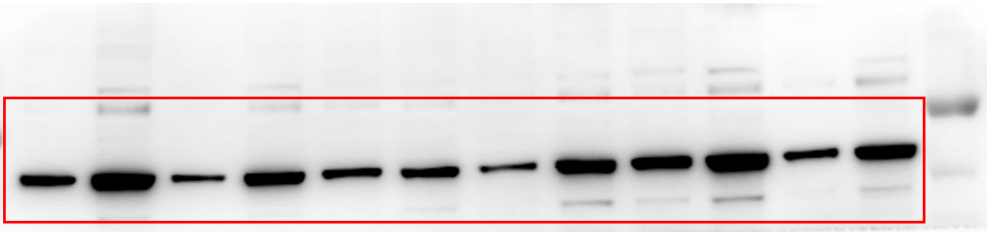

GAPDH

40 KD  
35 KD  
25 KD

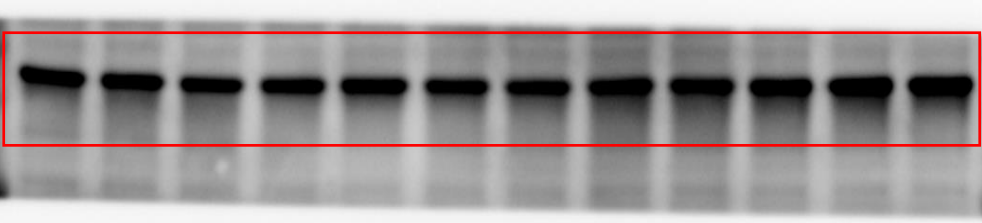

40 KD  
35 KD  
25 KD

PRPF19

100 KD  
70 KD  
55 KD

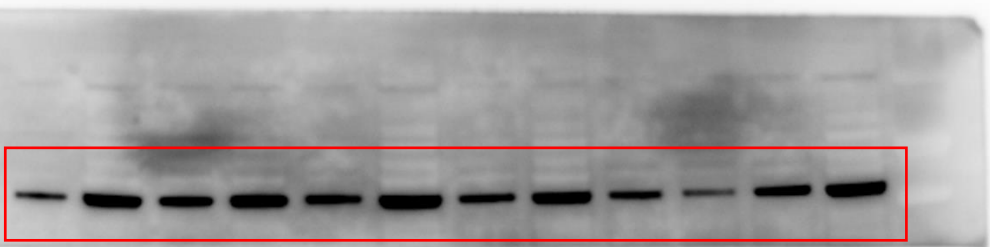

GAPDH

40 KD  
35 KD  
25 KD

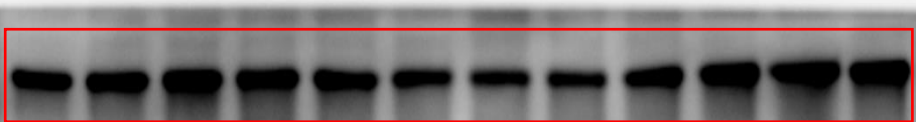

40 KD  
35 KD  
25 KD

**Figure 2A**

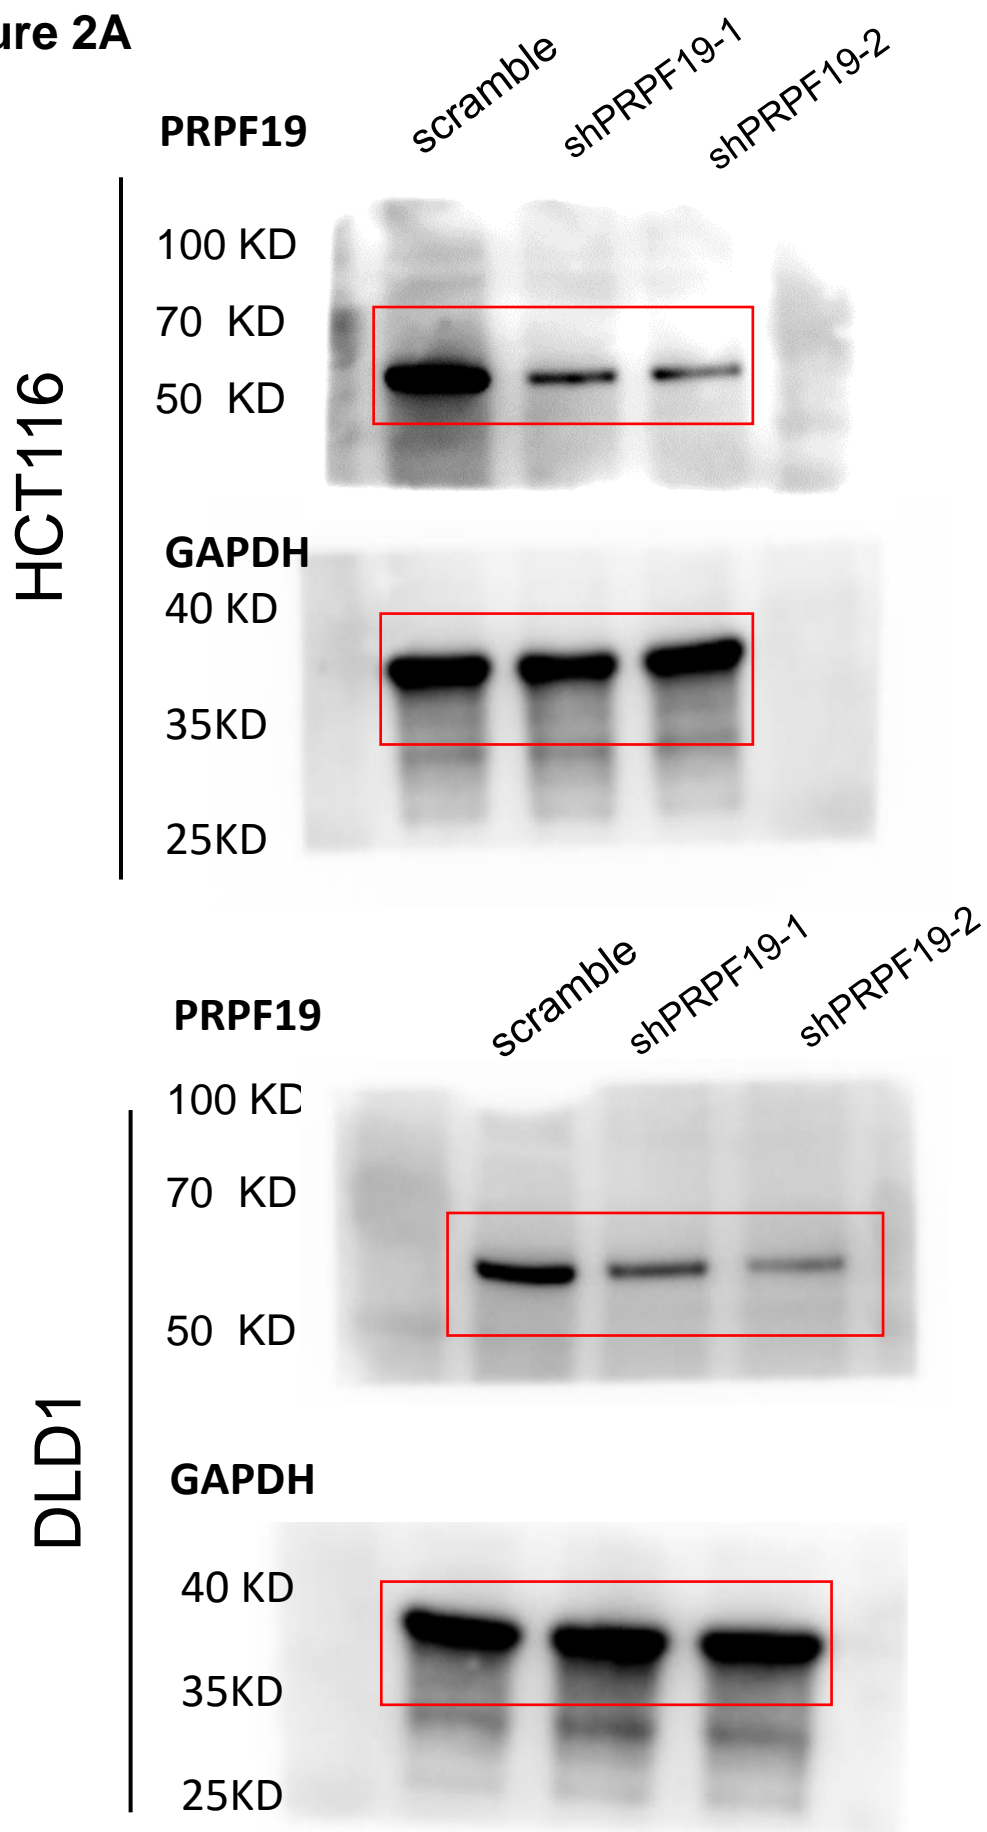

**Figure 2A**

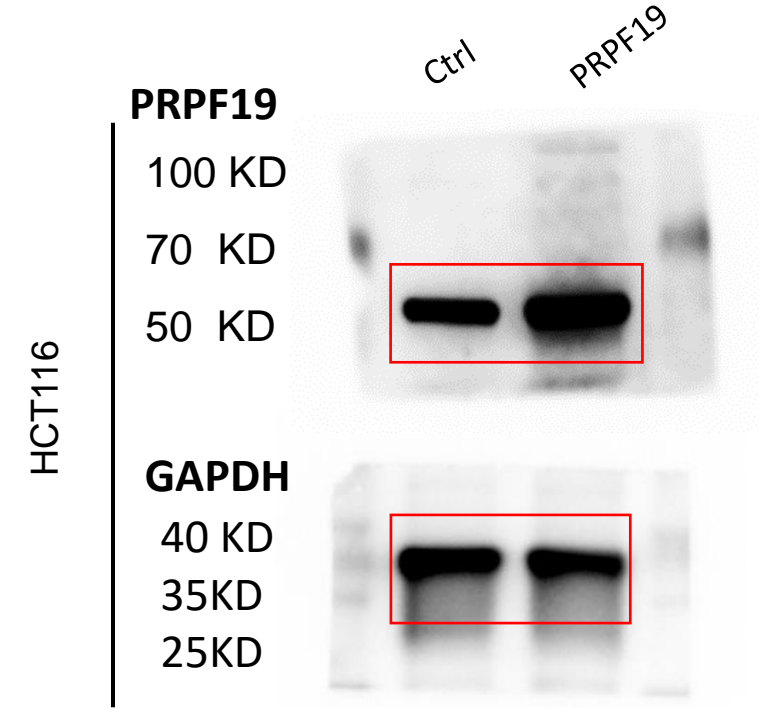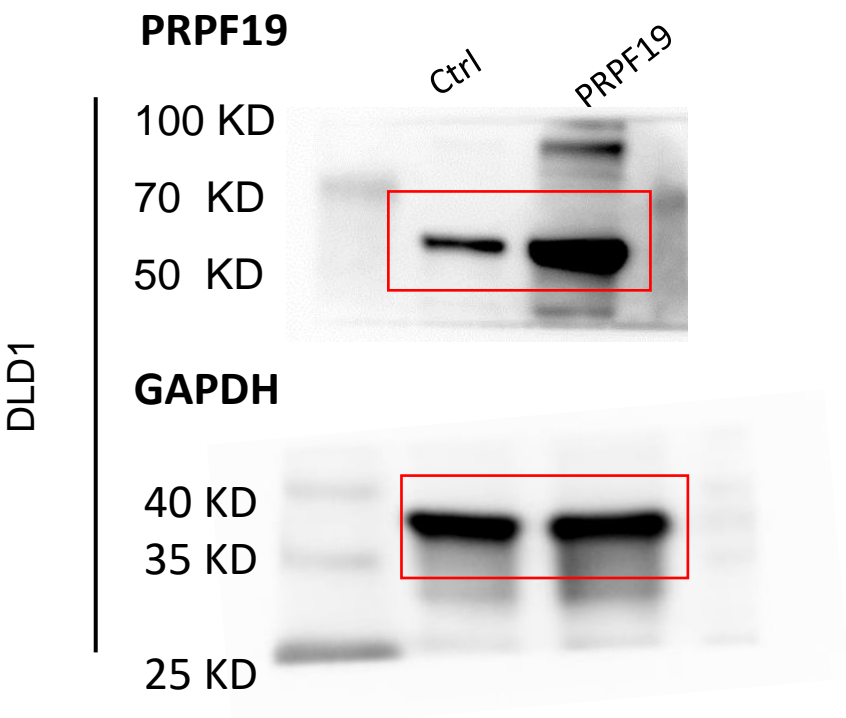

**Figure 3B**

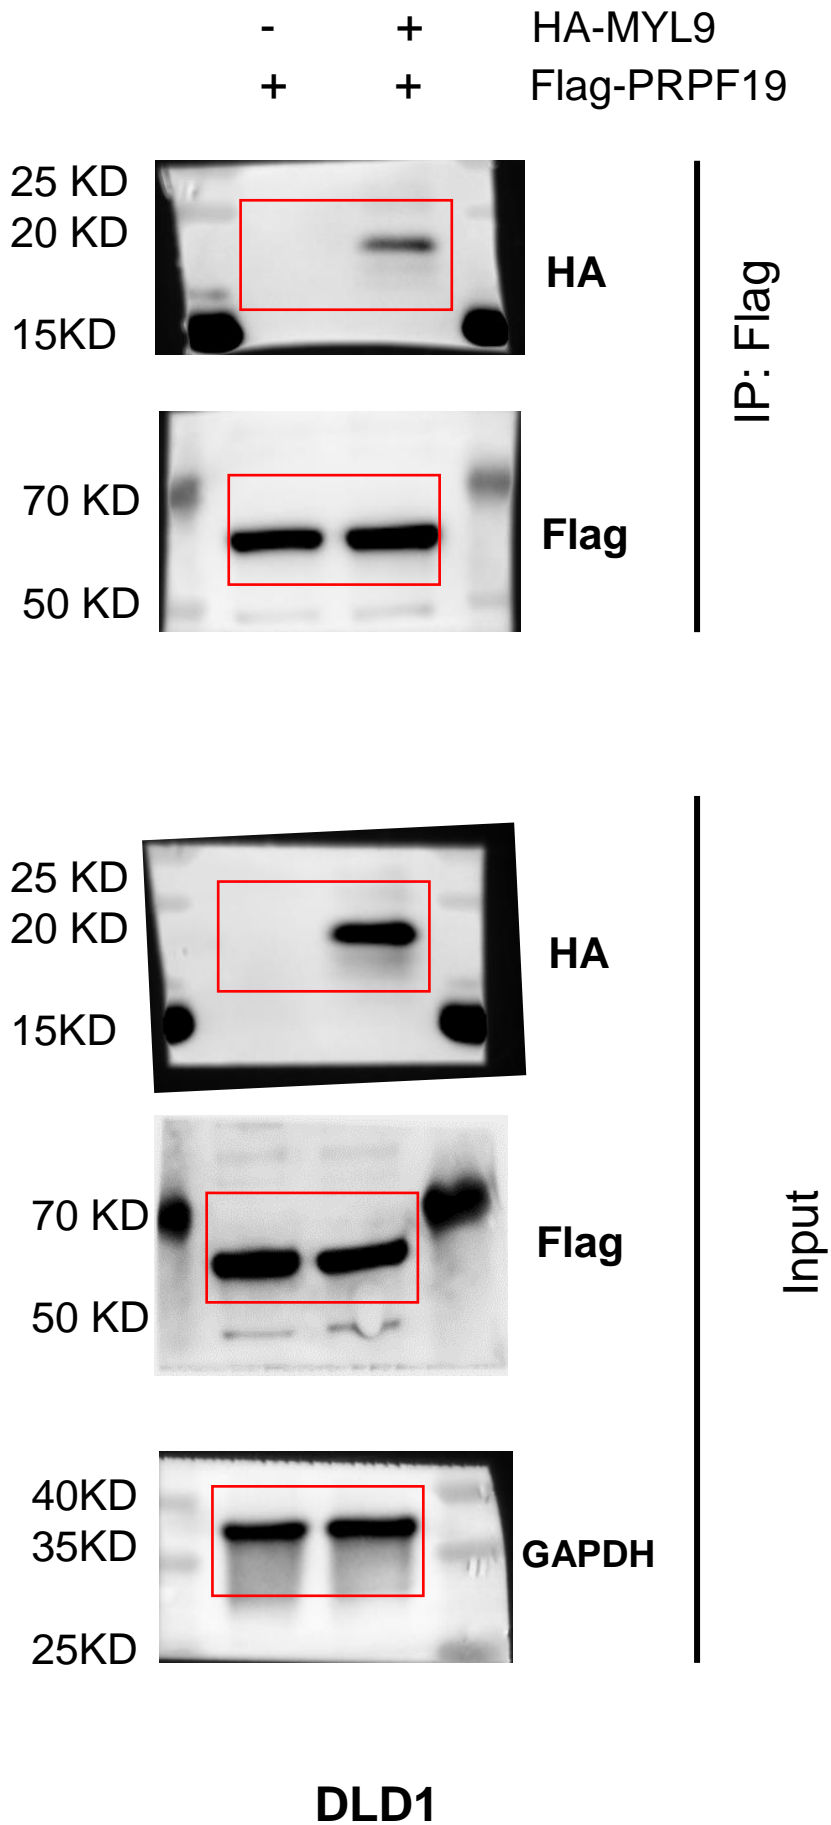

**Figure 3B**

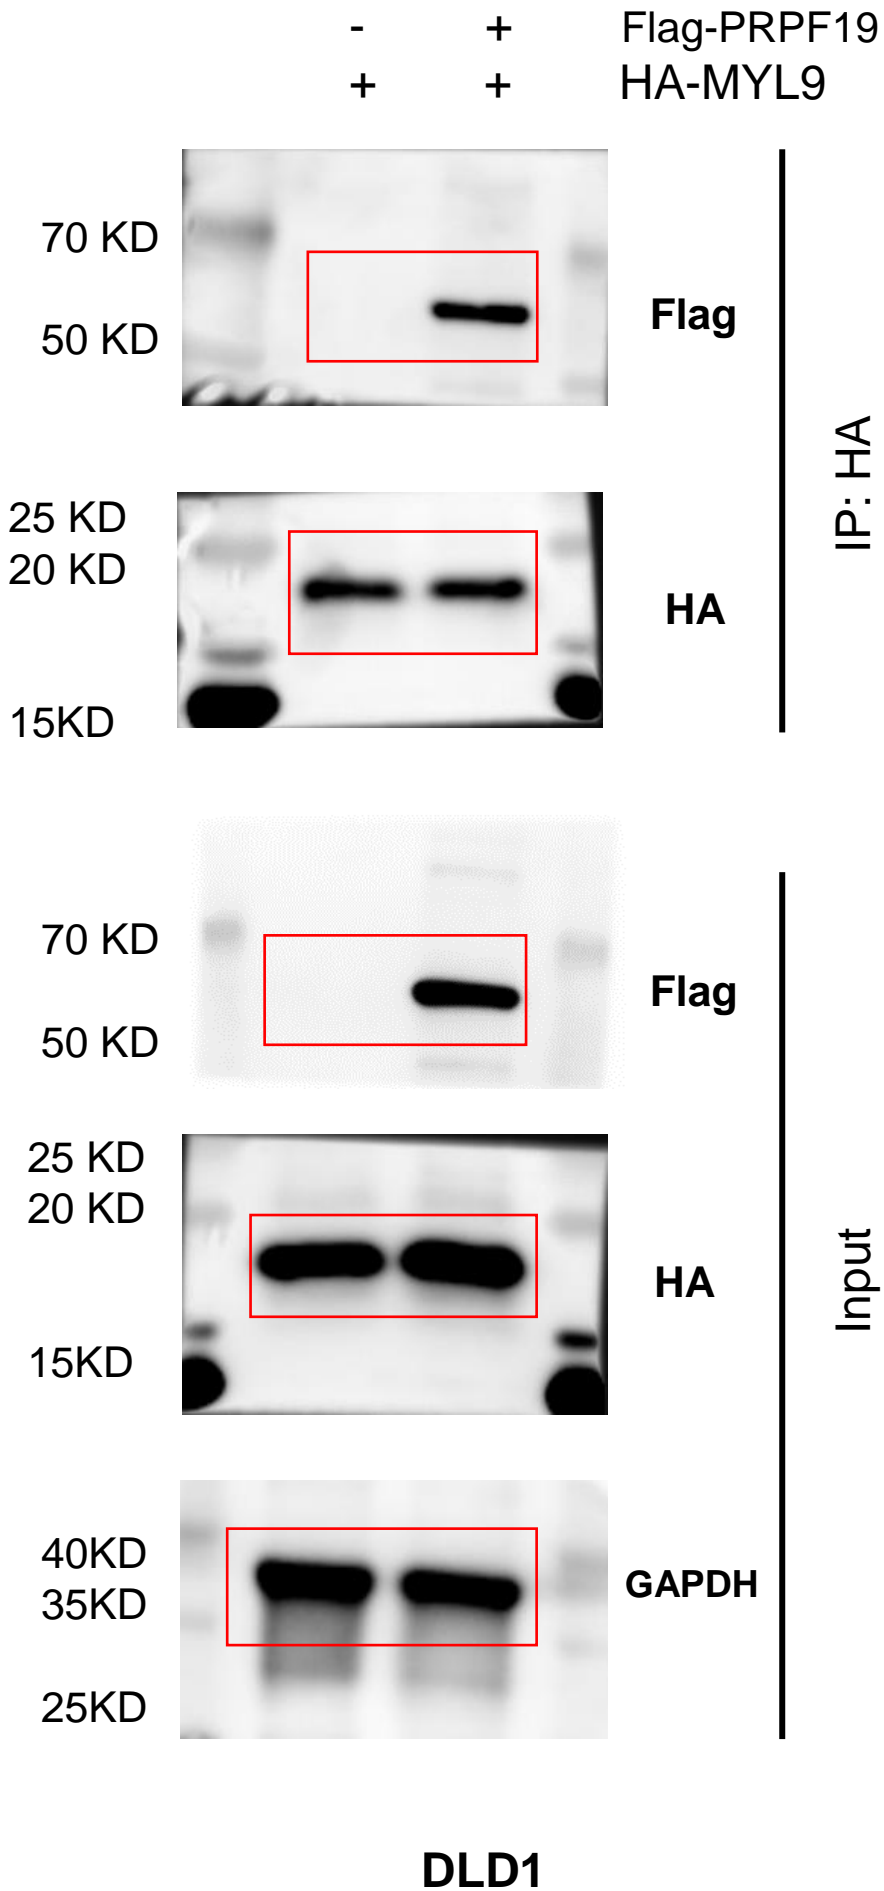

**DLD1**

**Figure 3C**

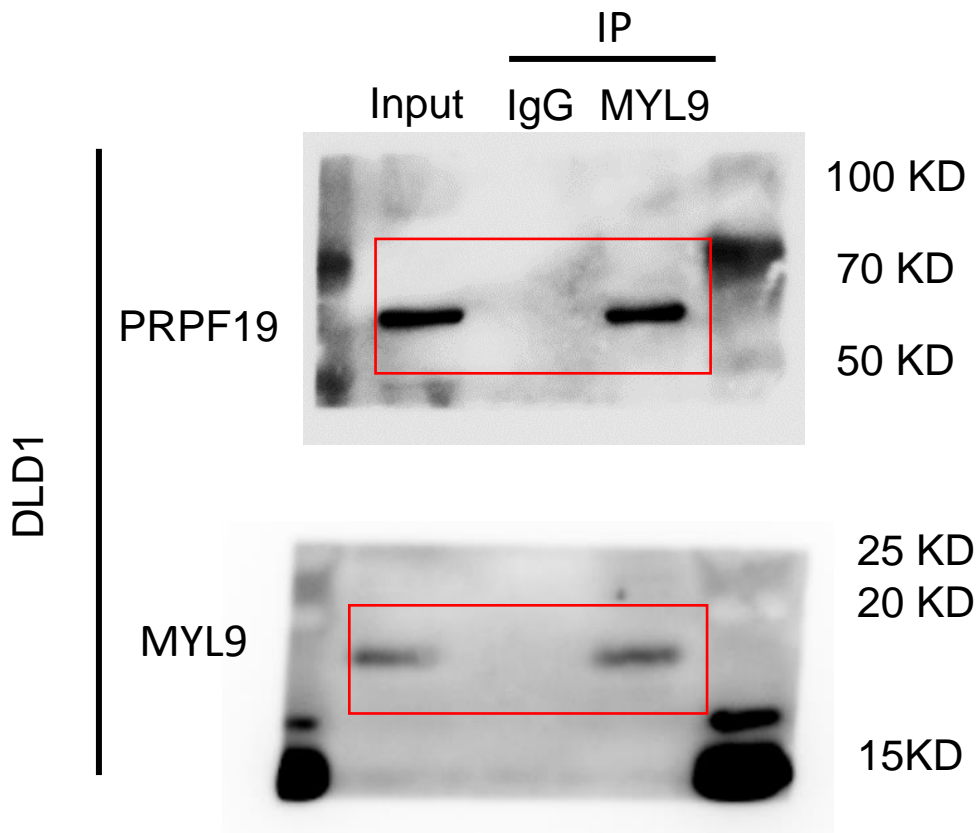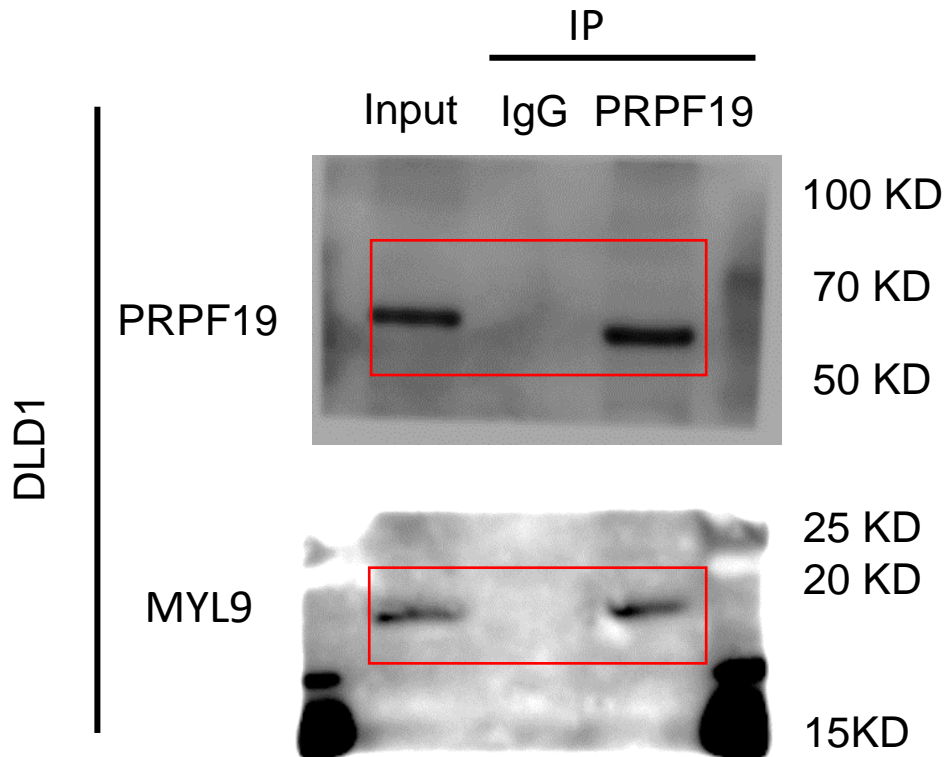

**Figure 3E**

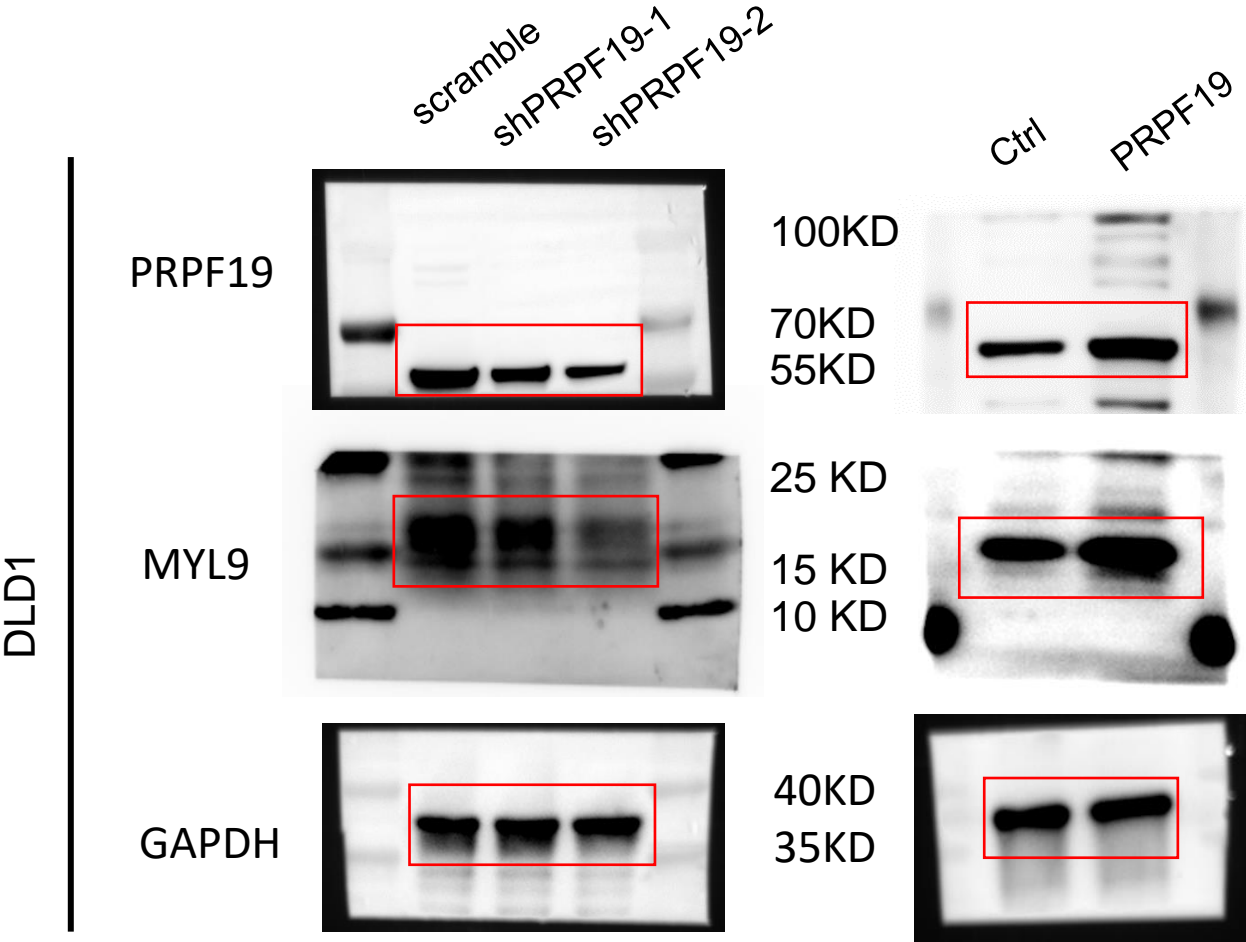

**Figure 3F**

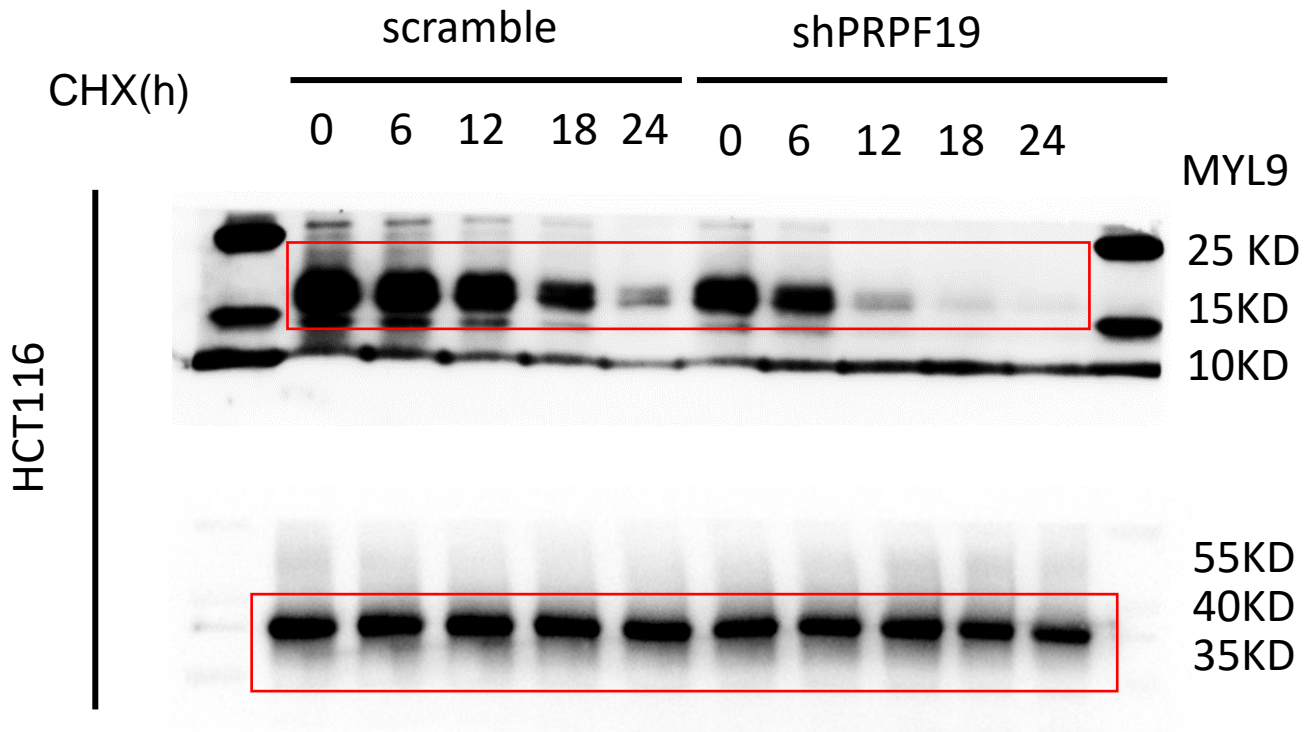





**Figure 4A**

|        |   |   |   |   |
|--------|---|---|---|---|
| Ctrl   | + | - | + | - |
| PRPF19 | - | + | - | + |
| MG132  | - | - | + | + |

100 KD

70KD

50KD

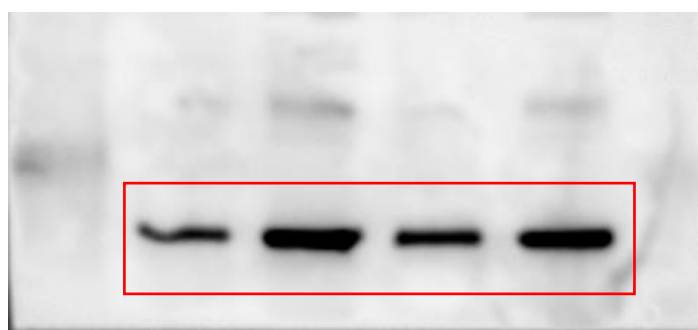

PRPF19

25 KD

20KD

15KD

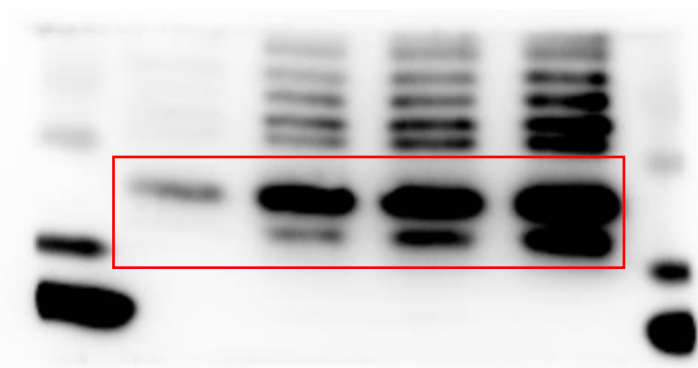

MYL9

40 KD

35 KD

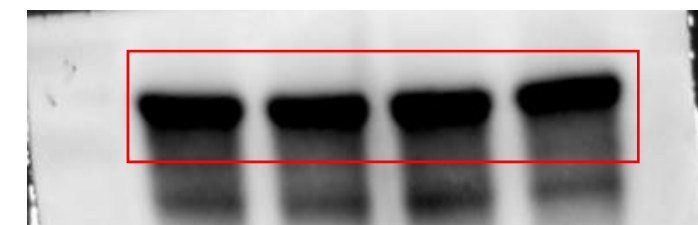

GAPDH

DLD1

**Figure 4B**

|          |   |   |   |   |
|----------|---|---|---|---|
| scramble | + | - | + | - |
| shPRPF19 | - | + | - | + |
| MG132    | - | - | + | + |

100 KD

70KD

50KD

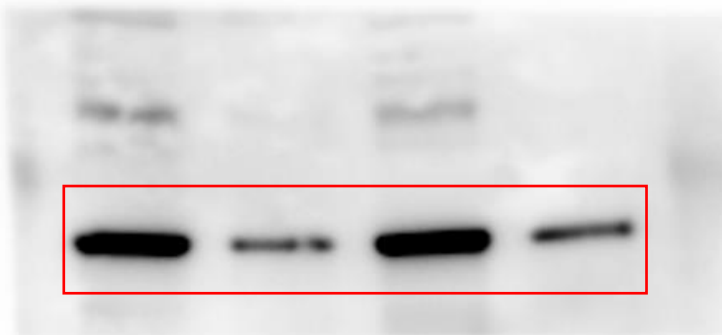

PRPF19

25 KD

20KD

15KD

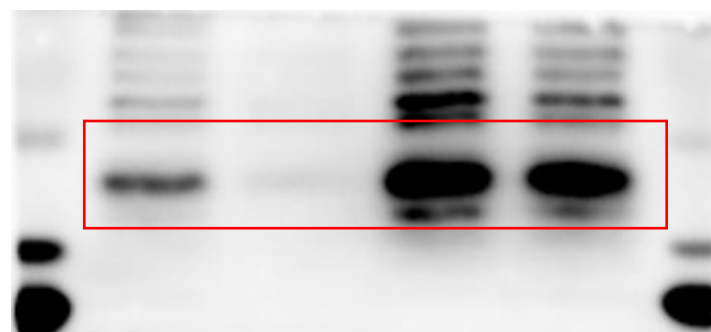

MYL9

40 KD

35 KD

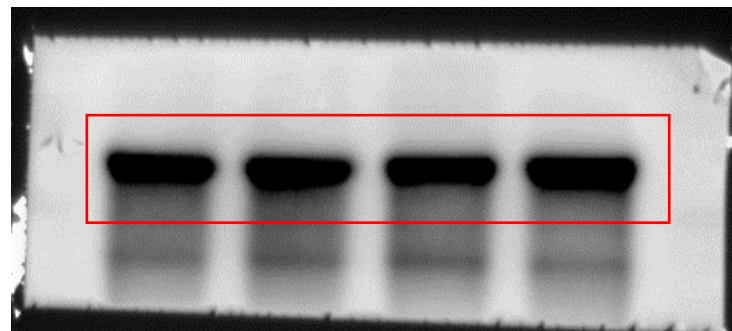

GAPDH

HCT116

**Figure 4C**

|             |   |   |   |   |
|-------------|---|---|---|---|
| His-Ub      | - | + | + | + |
| si-NC       | + | + | - | - |
| si-PRPF19-1 | - | - | + | - |
| si-PRPF19-2 | - | - | - | + |
| HA-MYL9     | + | + | + | + |

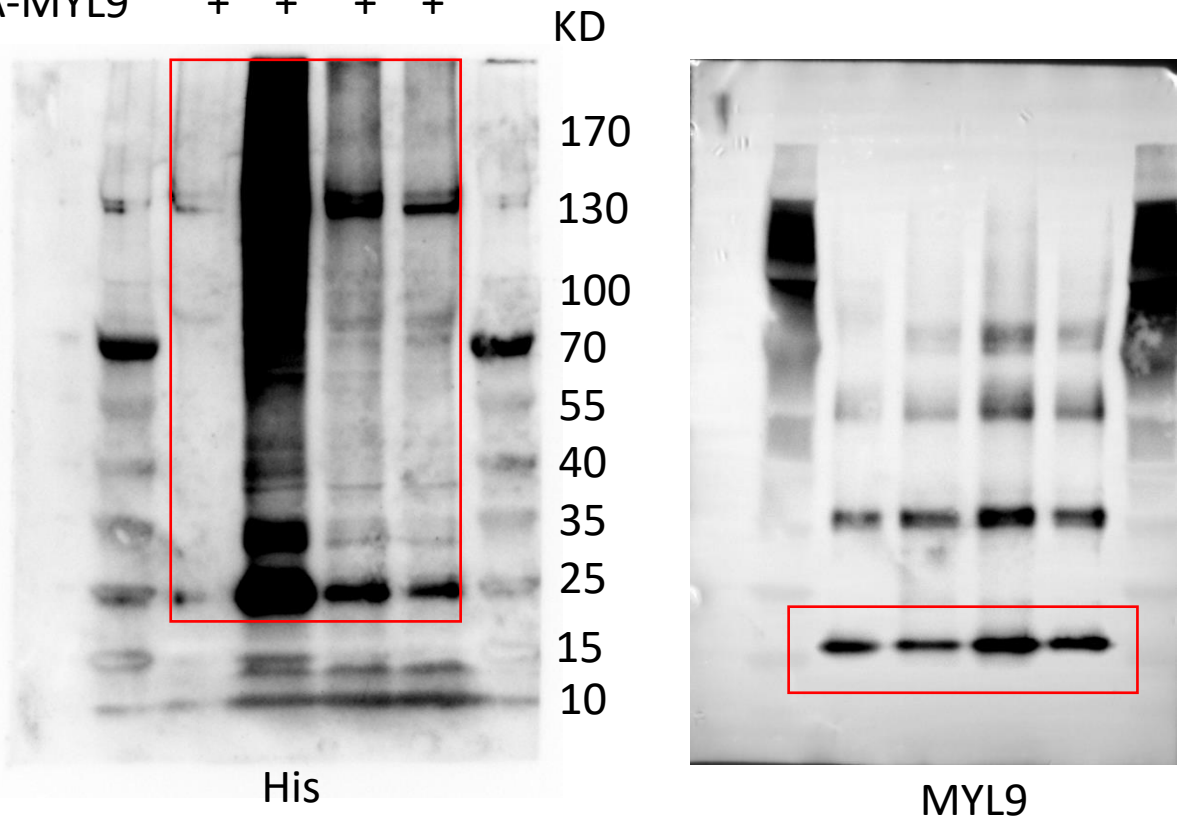

IP: MYL9

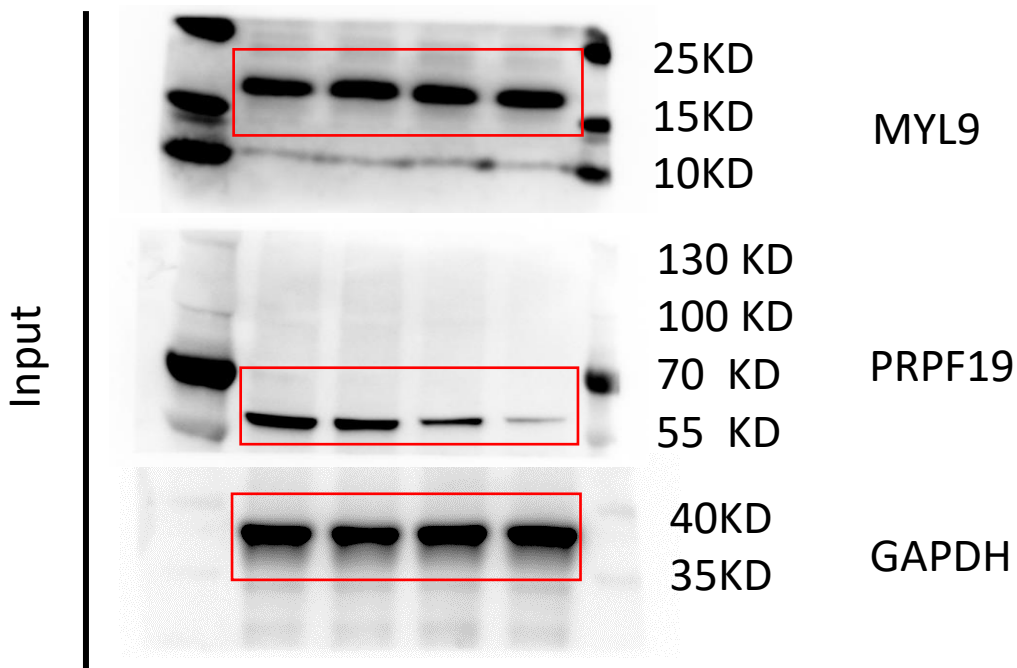

**Figure 4D**

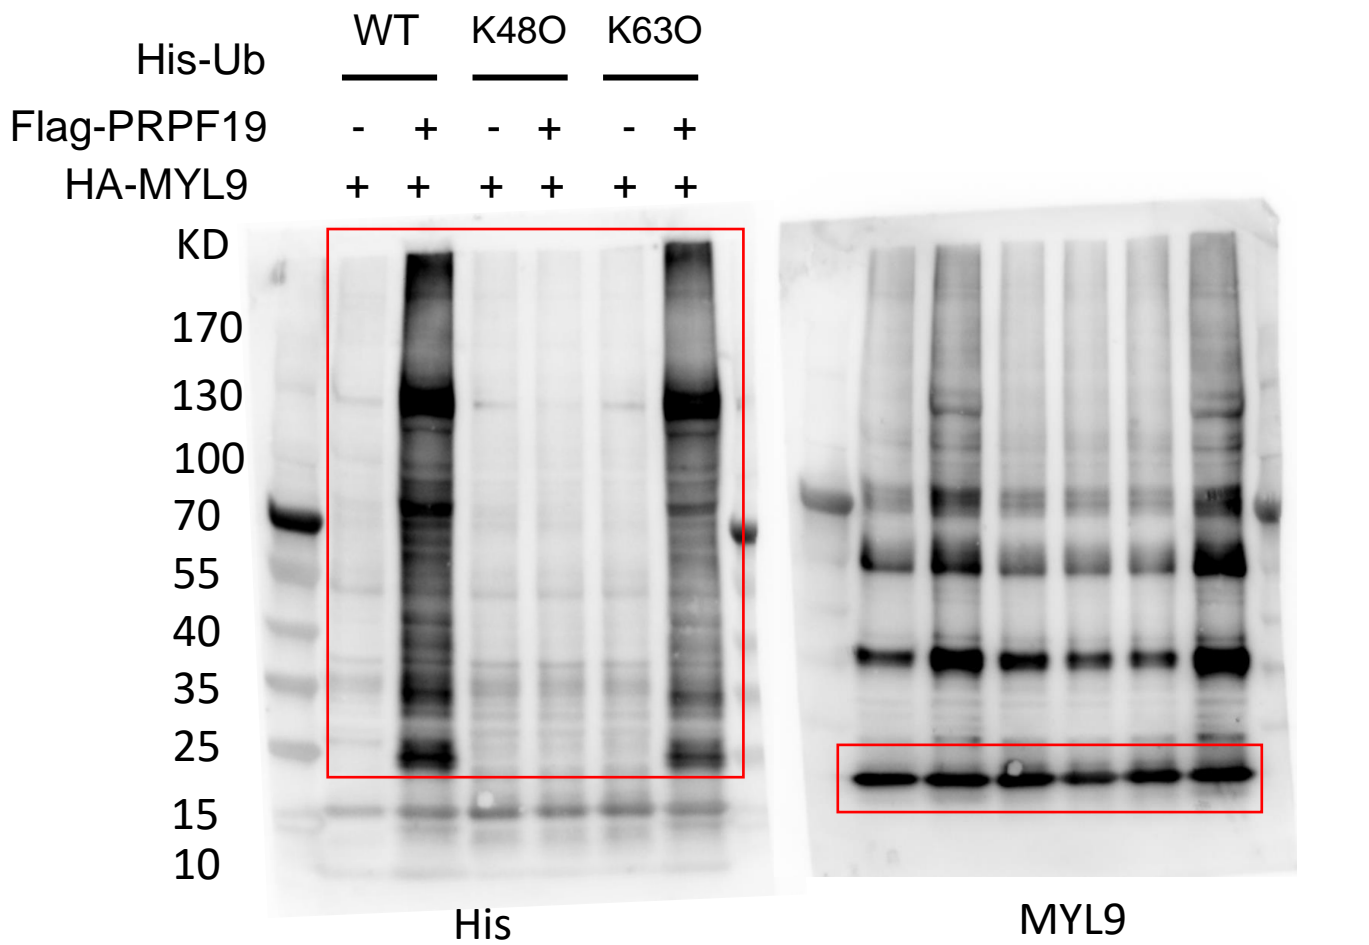

IP: MYL9

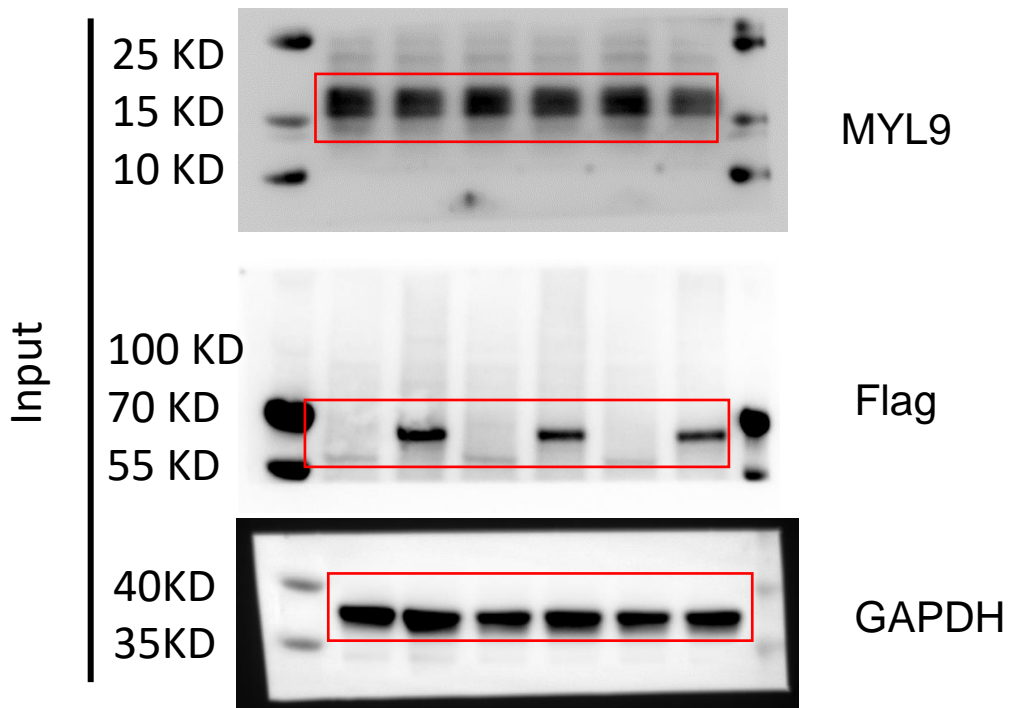

**Figure 4E**

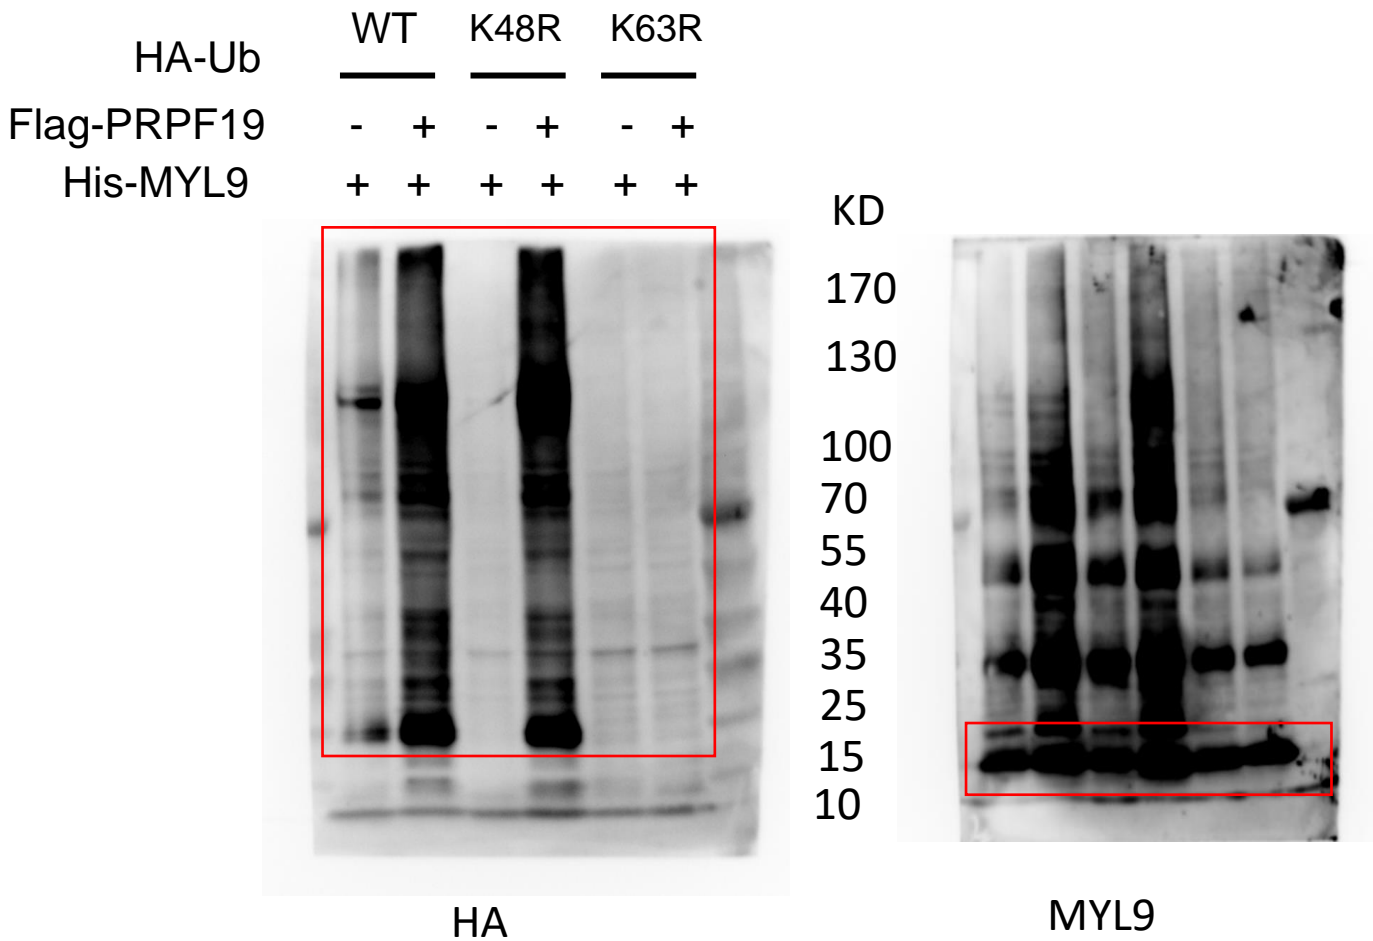

IP: MYL9

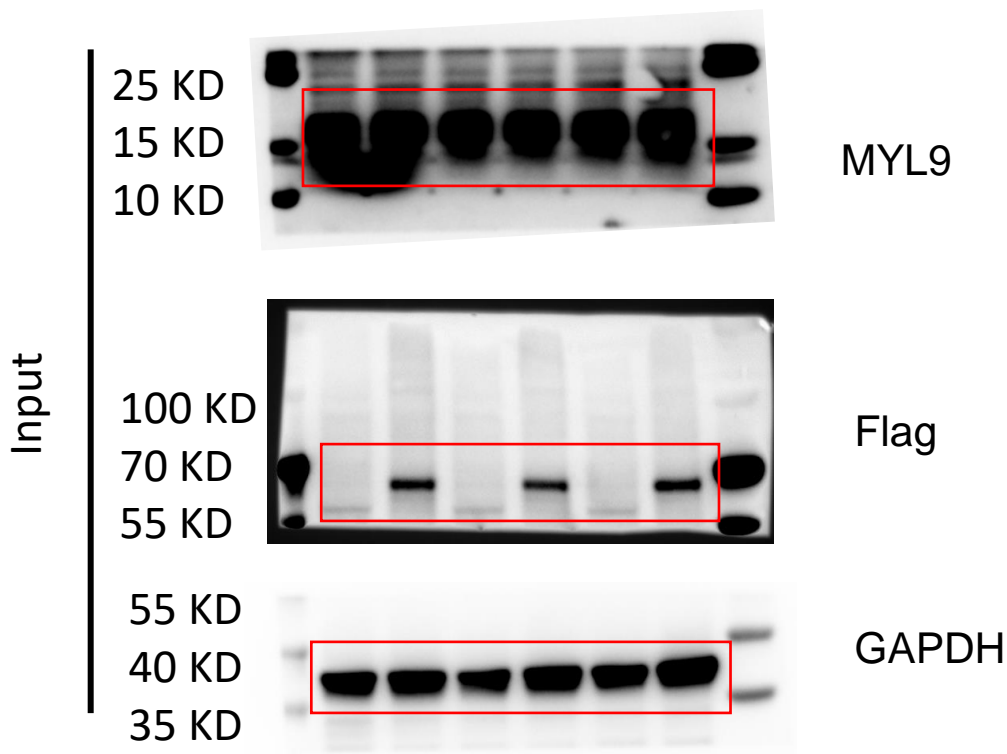

**Figure 4F**

|             |   |   |
|-------------|---|---|
| ATP         | + | + |
| Ubiquitin   | + | + |
| E1          | + | + |
| E2          | + | + |
| Flag-PRPF19 | - | + |
| MYL9        | + | + |

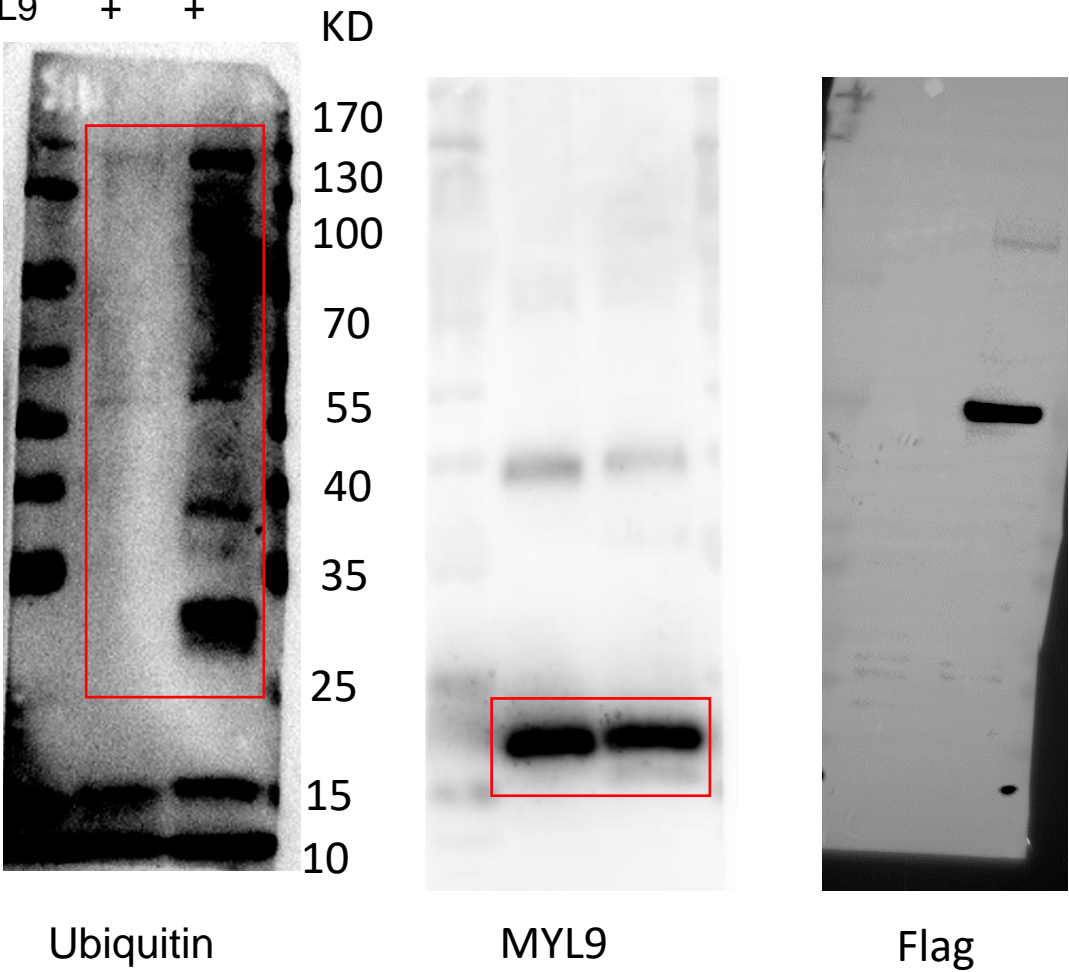

# Figure 6C

|        |   |   |   |   |
|--------|---|---|---|---|
| Ctrl   | + | - | + | - |
| PRPF19 | - | + | - | + |
| siNC   | + | + | - | - |
| siMYL9 | - | - | + | + |

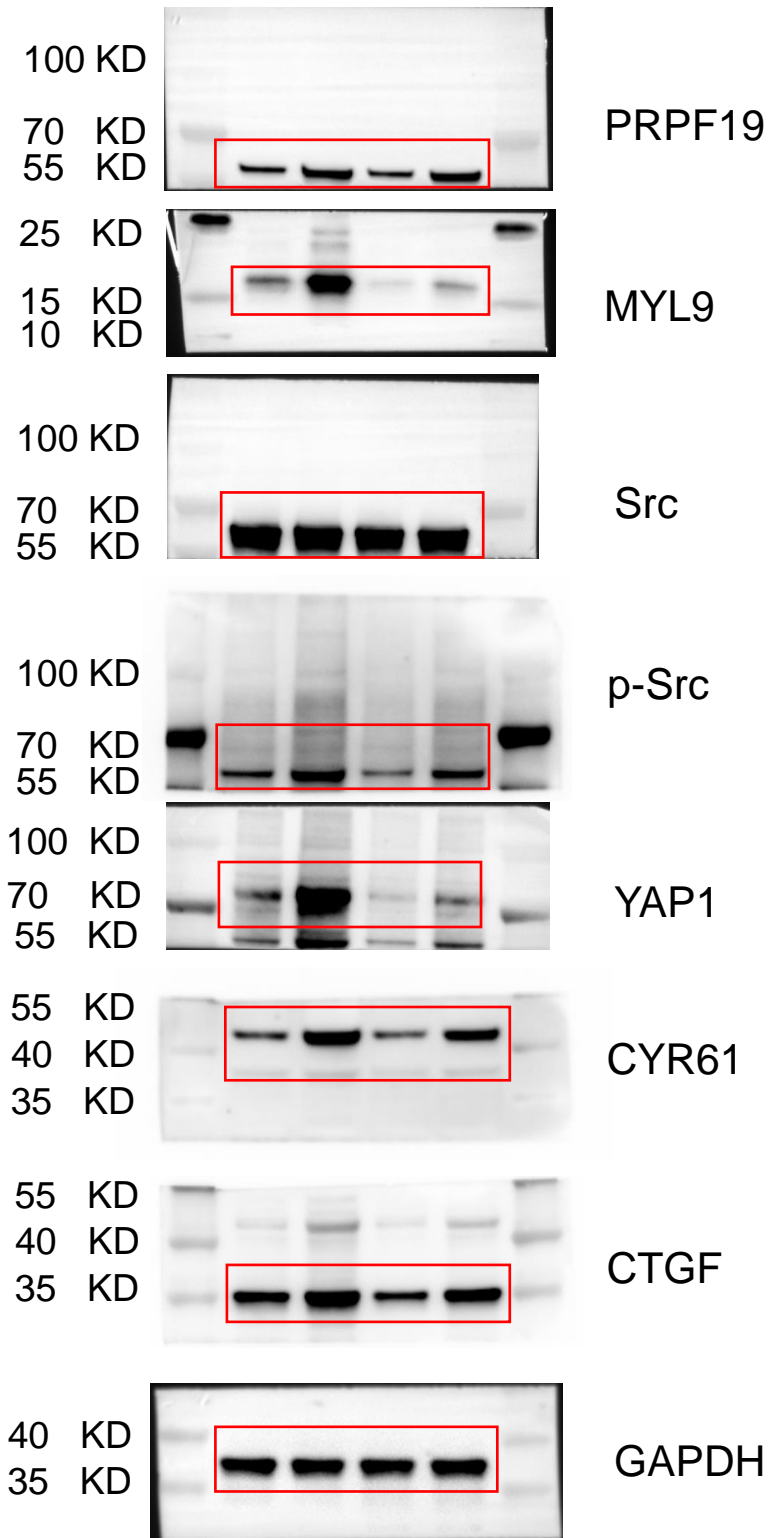



**Figure 6D**

|          |   |   |   |   |
|----------|---|---|---|---|
| scramble | + | - | + | - |
| shPRPF19 | - | + | - | + |
| pR       | + | + | - | - |
| pR-MYL9  | - | - | + | + |

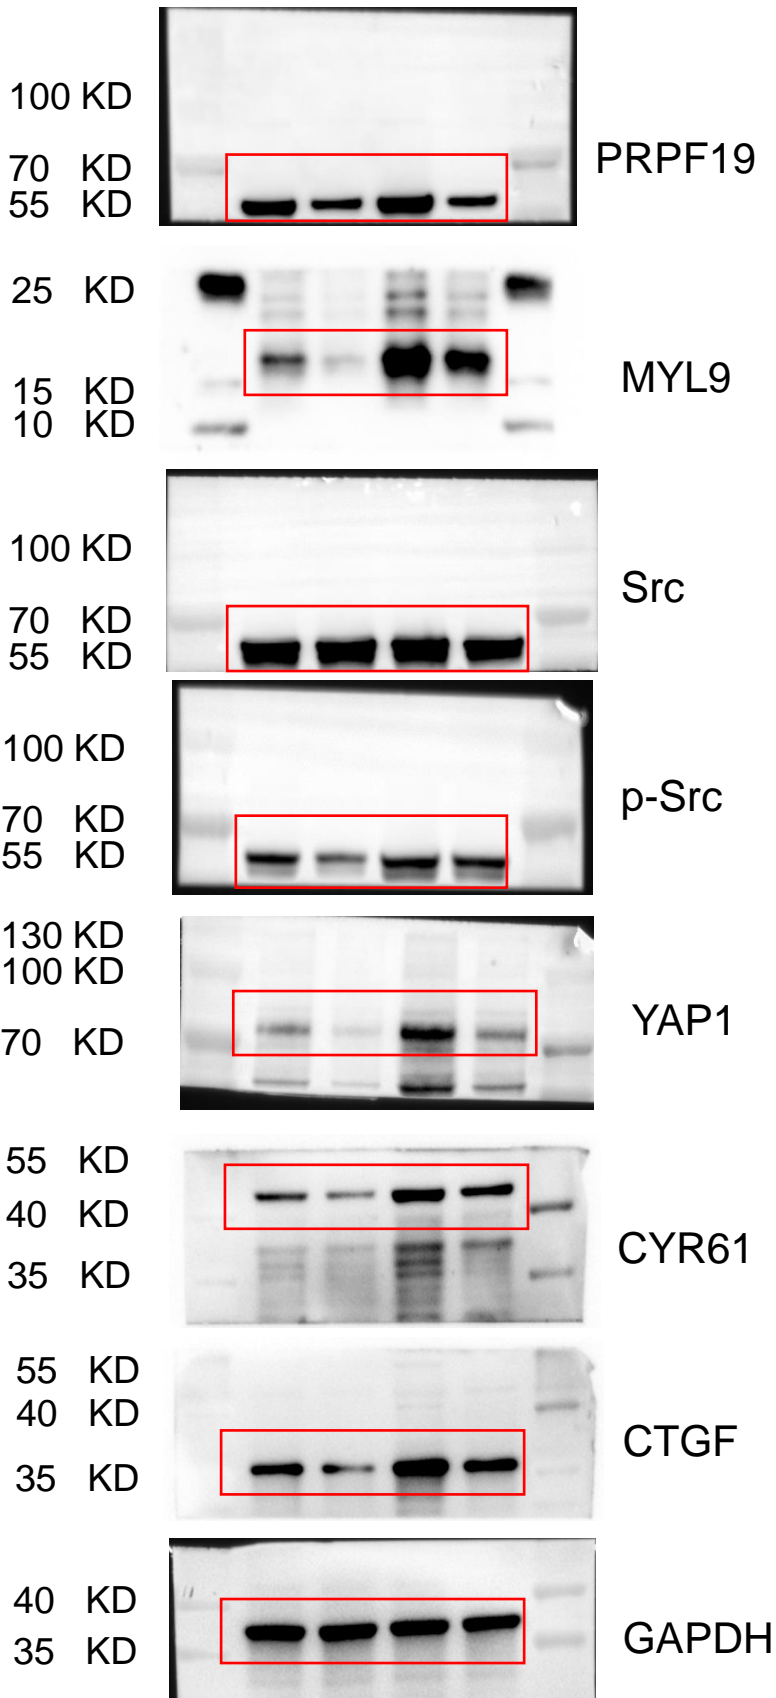



# Supplementary Figure 3A

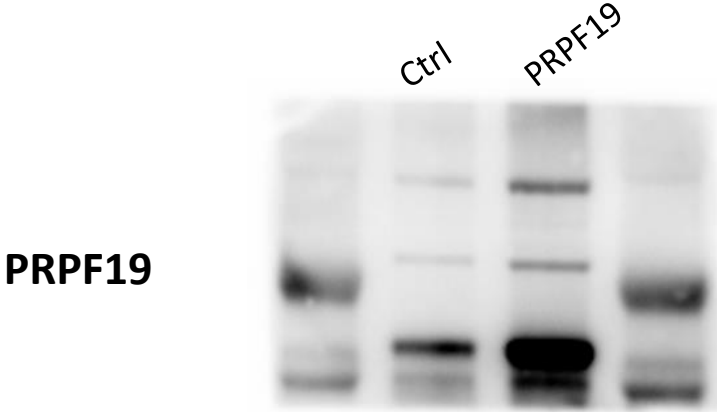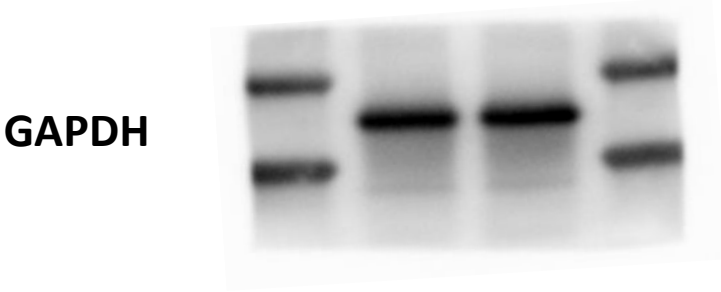

HCT 15

# Supplementary Figure 5A

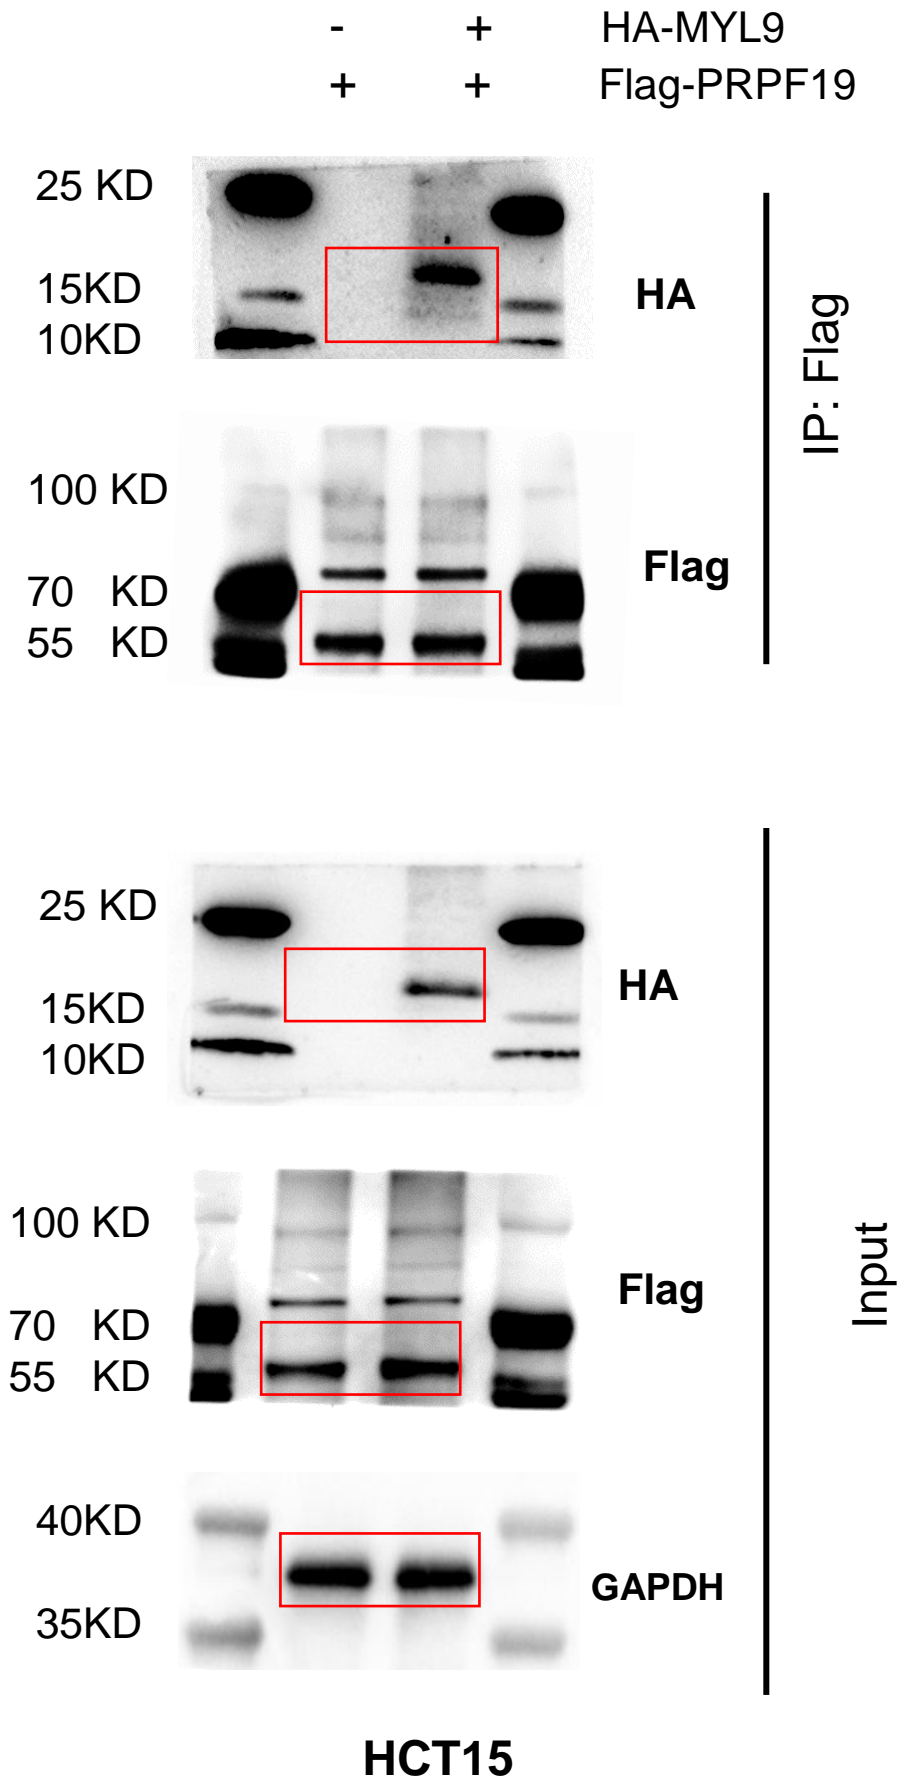

# Supplementary Figure 5A

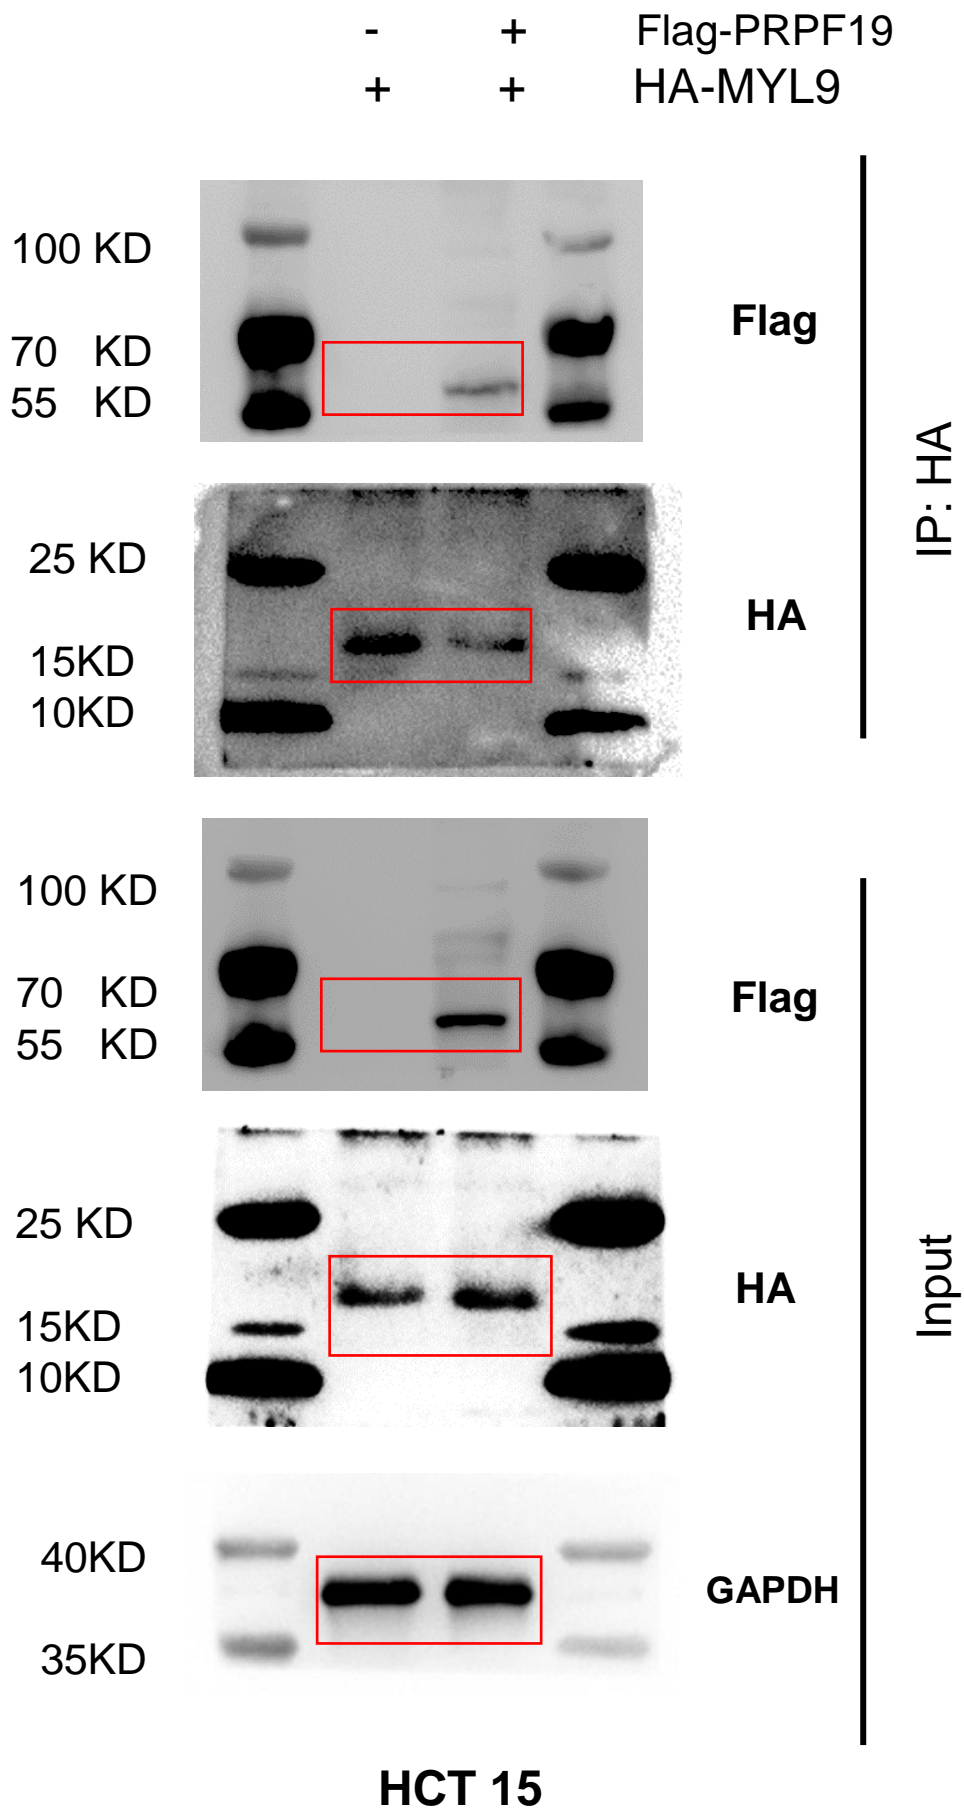

# Supplementary Figure 5B

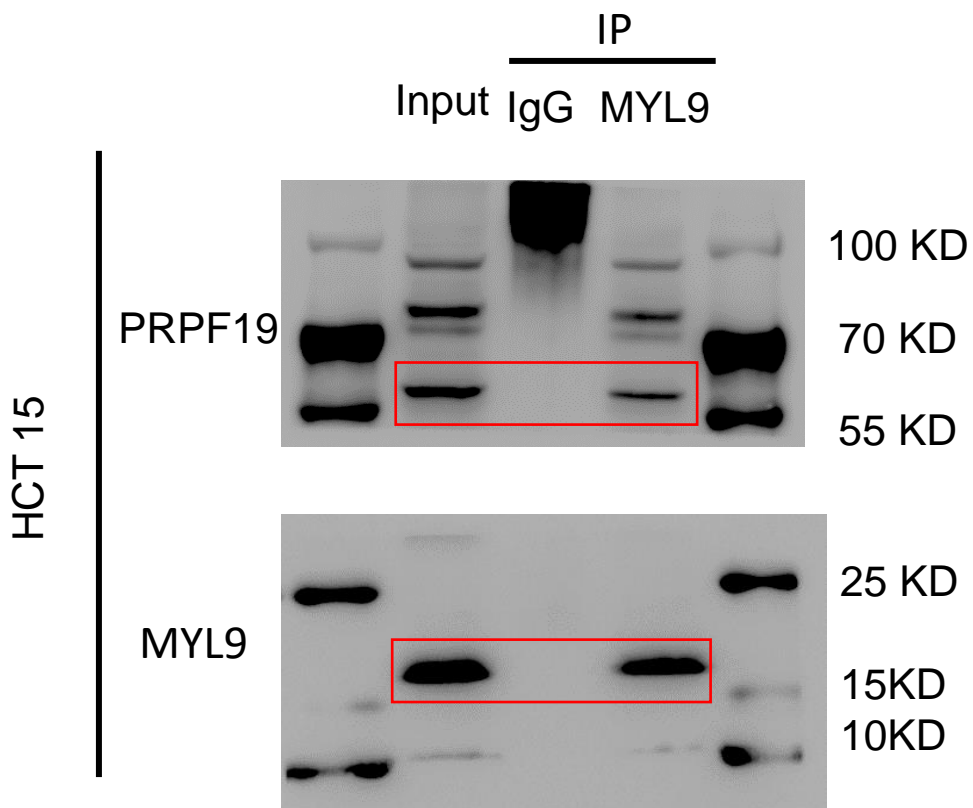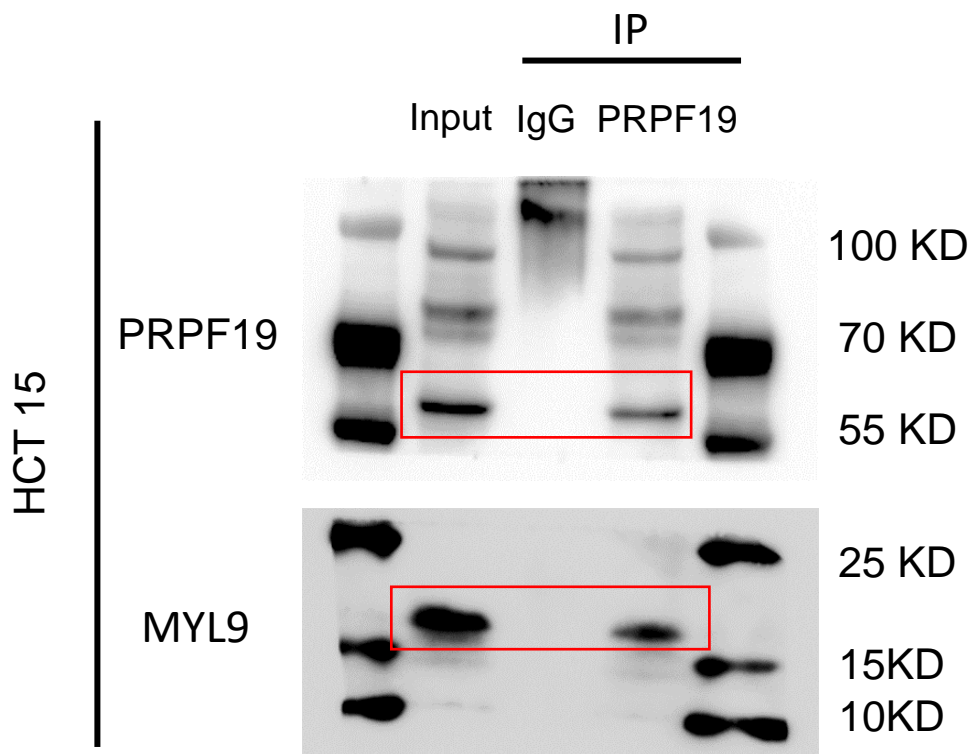

# Supplementary Figure 5C

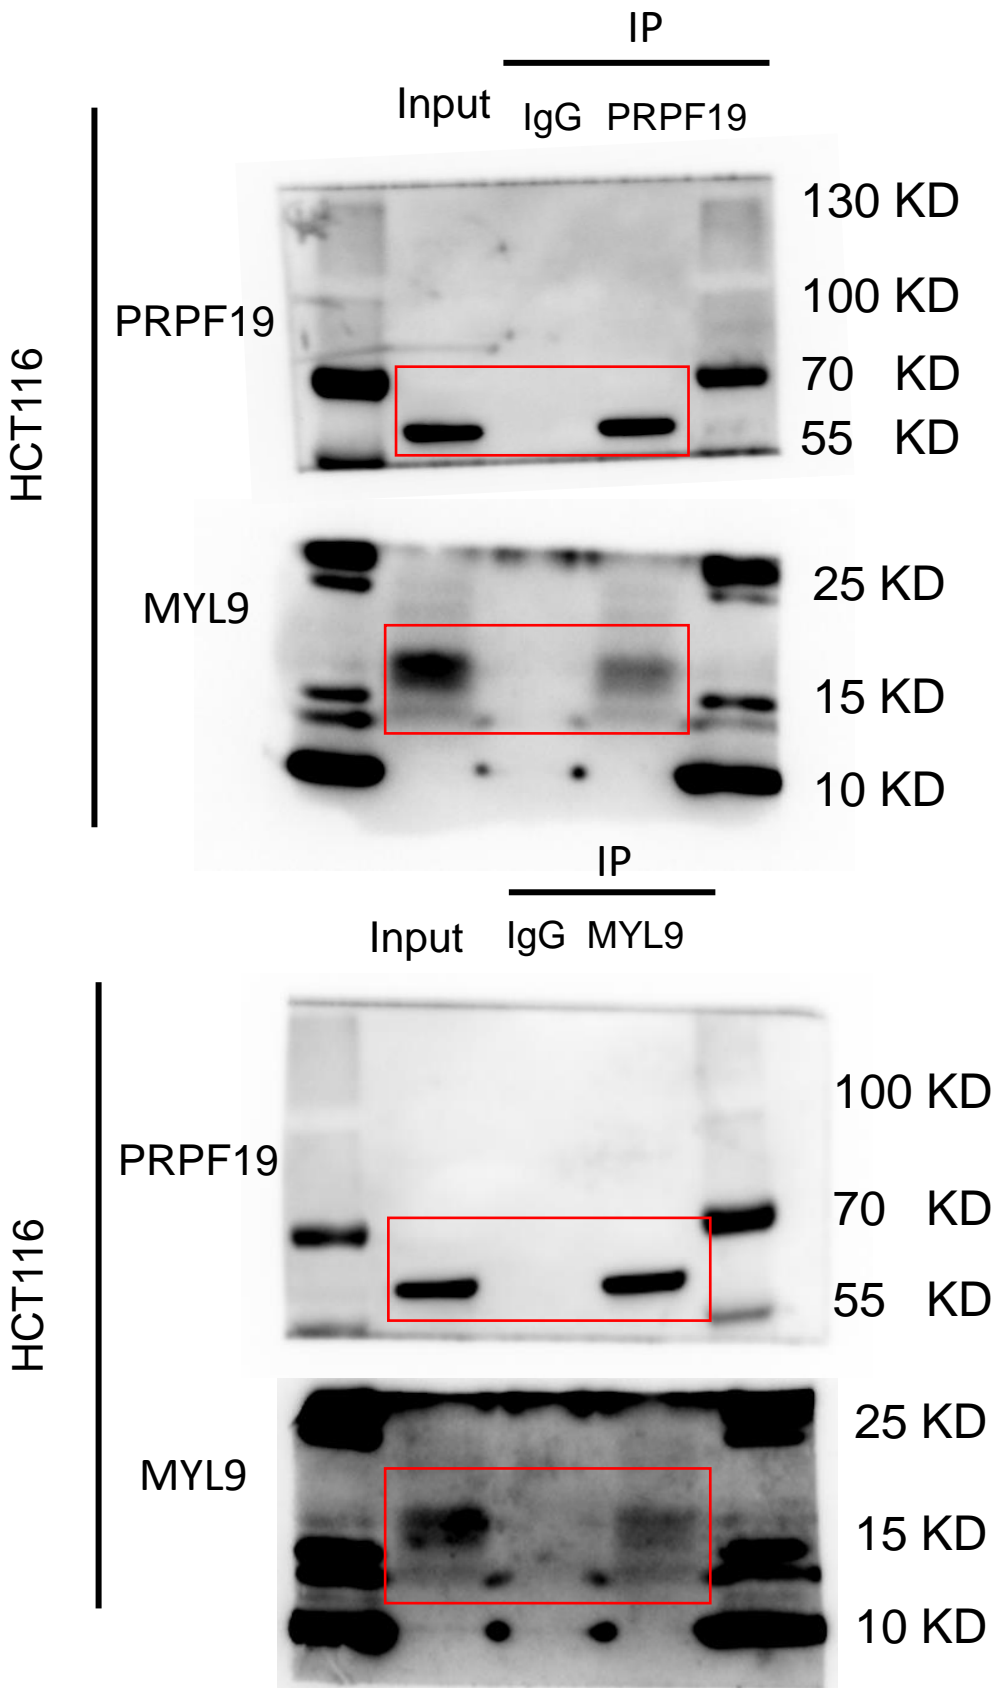

# Supplementary Figure 5D

|             |   |   |   |   |
|-------------|---|---|---|---|
| GST         | + | + | - | - |
| GST-MYL9    | - | - | + | + |
| Flag-PRPF19 | - | + | - | + |

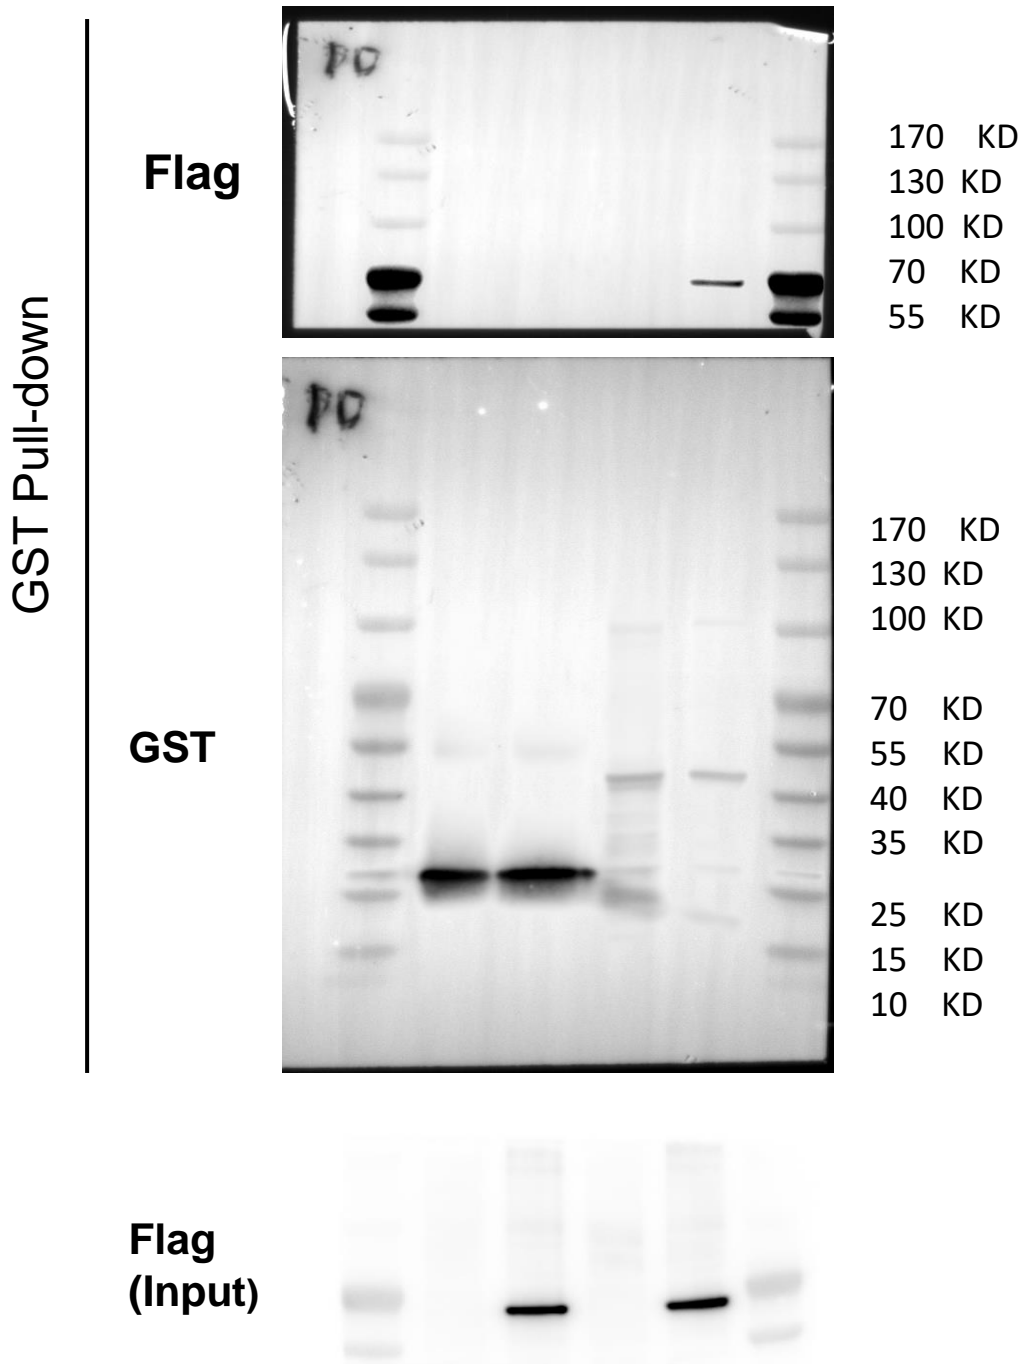



# Supplementary Figure 5F

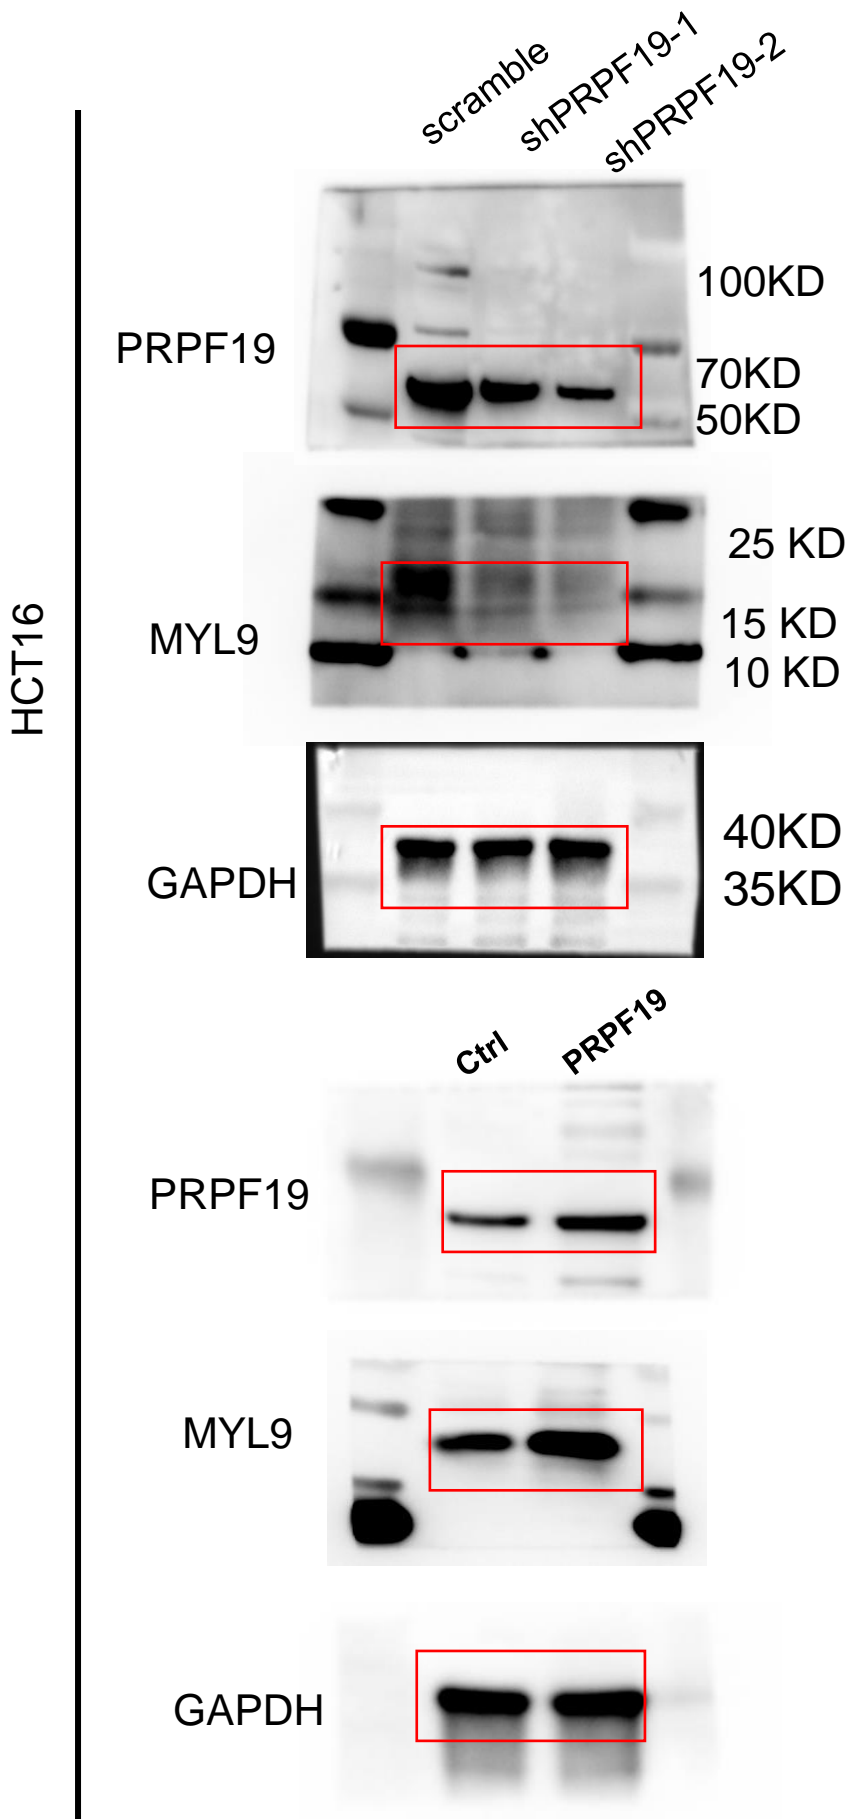

# Supplementary Figure 5H

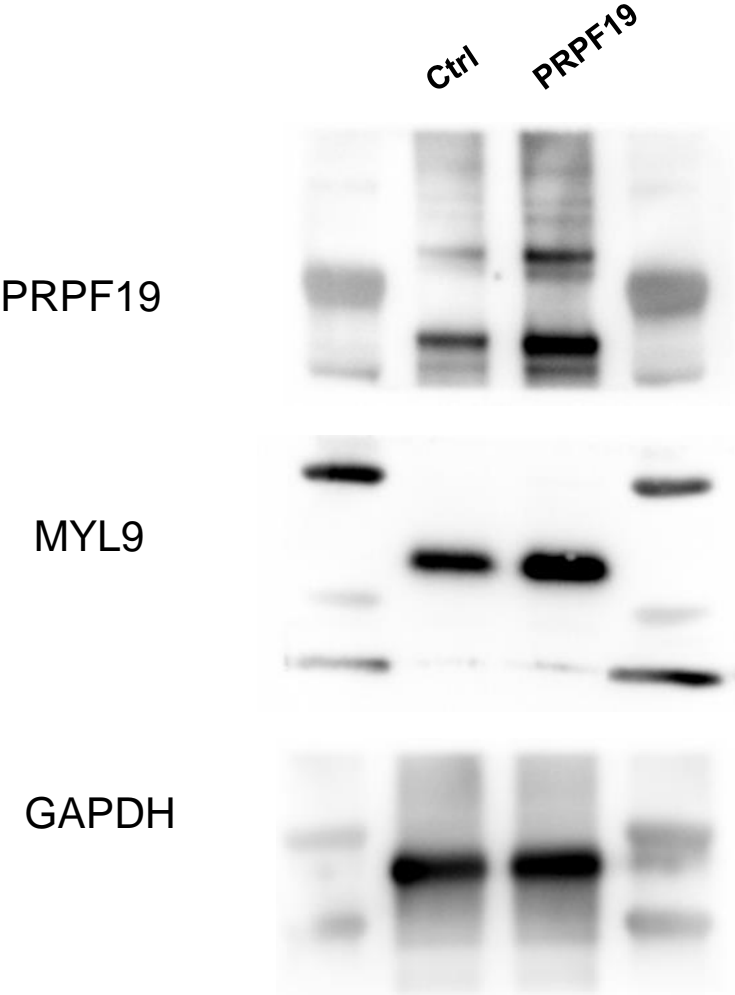

HCT 15

## Supplementary Figure 6A

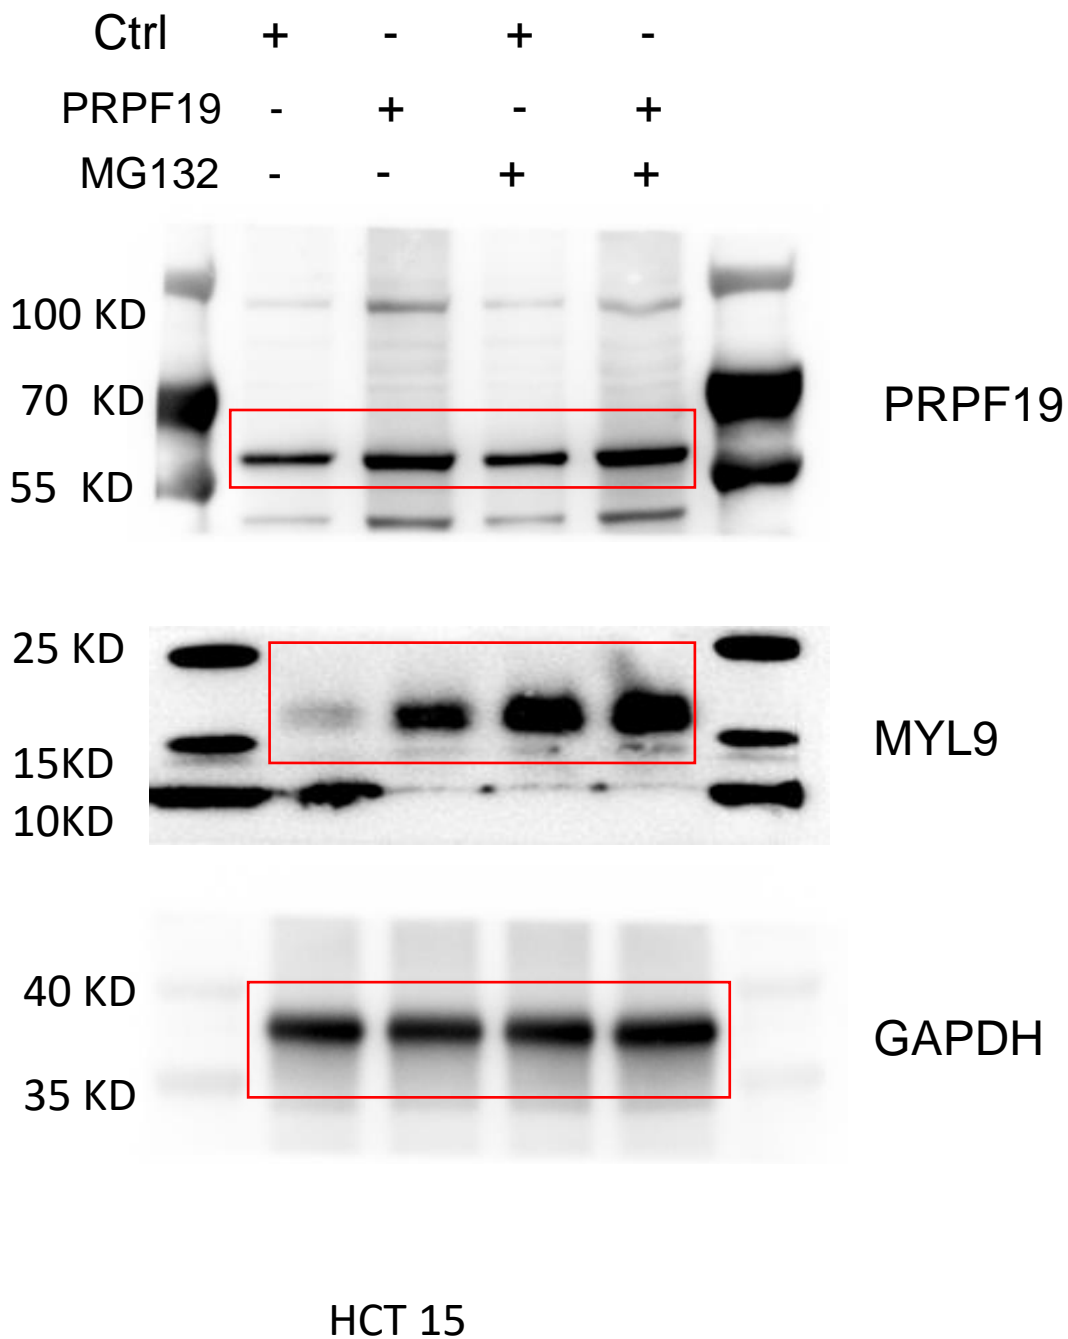

Supplement: 41419_2023_5776_MOESM13_ESM.pdf [file 41419_2023_5776_MOESM13_ESM.pdf]
